# Supplementary material for: Whole-Genome Analysis Illustrates Global Clonal Population Structure of the Ubiquitous Dermatophyte Pathogen Trichophyton rubrum
Source: PubMed Central journal article supplement (PMC5887155; doi:10.1534/genetics.117.300573), 2018-02-20
Supplement: 1657FigureS3.pdf [file 1657FigureS3.pdf]

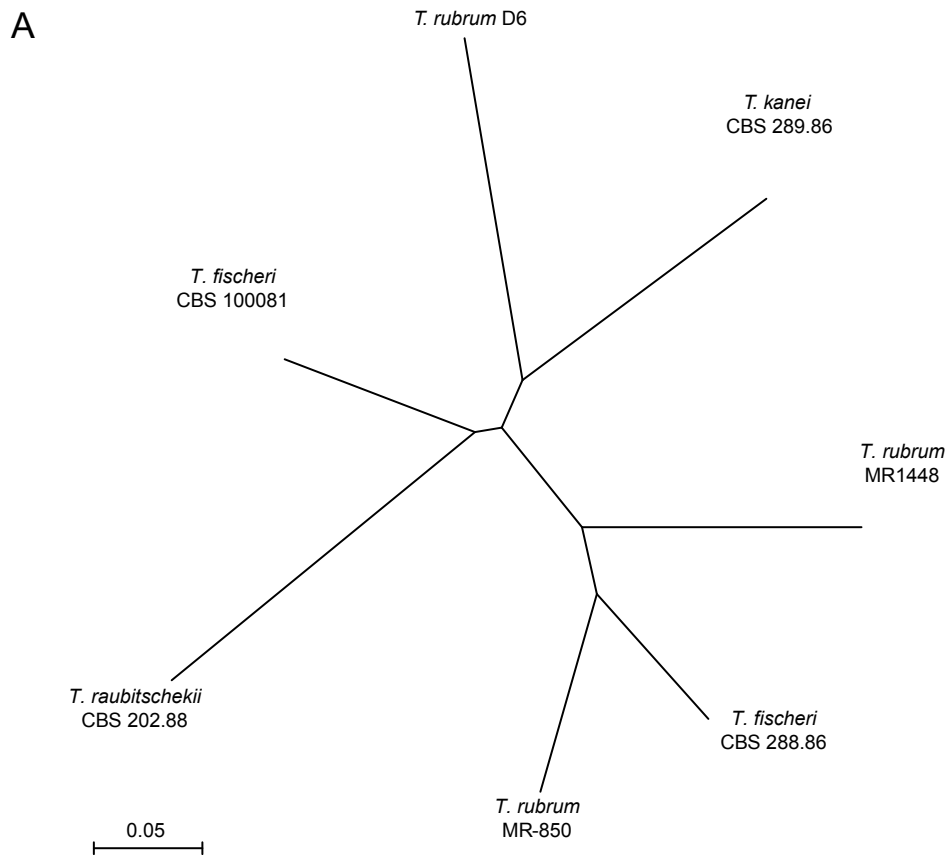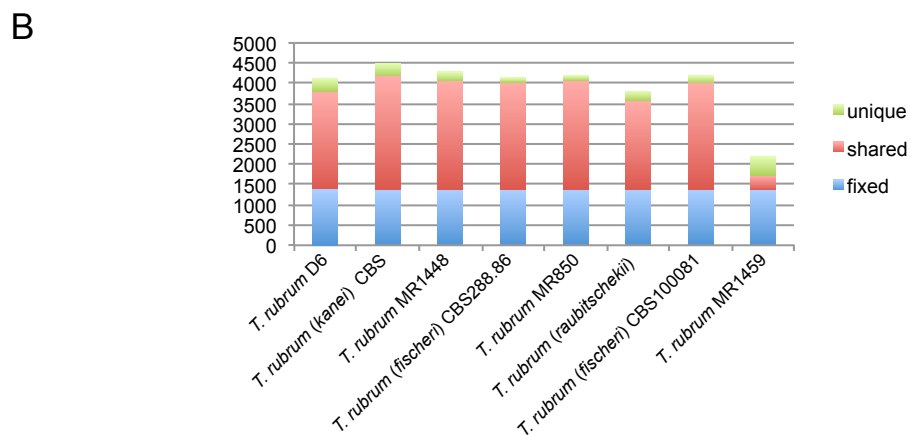

**Figure S3. Phylogenetic relationship and sharing of variant sites of sequenced *T. rubrum* isolates.** A. Phylogenetic relationship of *T. rubrum* isolates inferred using RAxML (Methods). B. Classification of SNP sites based on conservation across the sequenced isolates; unique: only in one isolate; shared: in two to seven isolates; fixed: in all eight isolates.
