# Supplementary material for: Whole-Genome Analysis Illustrates Global Clonal Population Structure of the Ubiquitous Dermatophyte Pathogen Trichophyton rubrum
Source: PubMed Central journal article supplement (PMC5887155; doi:10.1534/genetics.117.300573), 2018-02-20
Supplement: 1657FigureS5.pdf [file 1657FigureS5.pdf]

A.

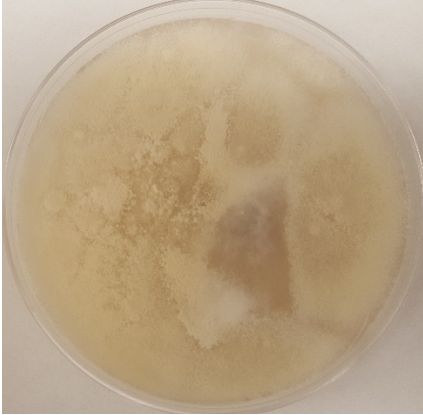

B.

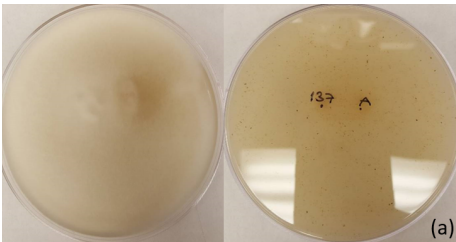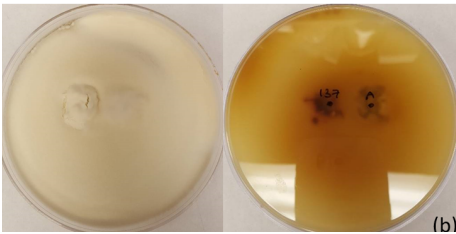

C.

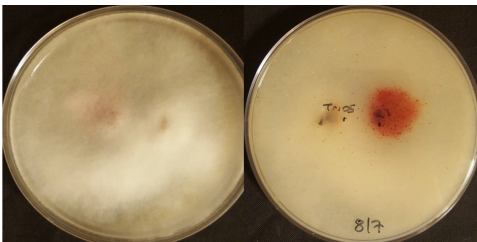

**Figure S5. Mating assays.** A. Mating assay plate; *T. rubrum* and *T. interdigitale* on E medium. B. Mating assay plate; *T. rubrum* and *A. simii* (a) E medium, (b) Takashio medium eight weeks. C. *T. rubrum* and *T. megninii* on E medium eight weeks.
