# Supplementary material for: Whole-Genome Analysis Illustrates Global Clonal Population Structure of the Ubiquitous Dermatophyte Pathogen Trichophyton rubrum
Source: PubMed Central journal article supplement (PMC5887155; doi:10.1534/genetics.117.300573), 2018-02-20
Supplement: 1657FigureS7.pdf [file 1657FigureS7.pdf]

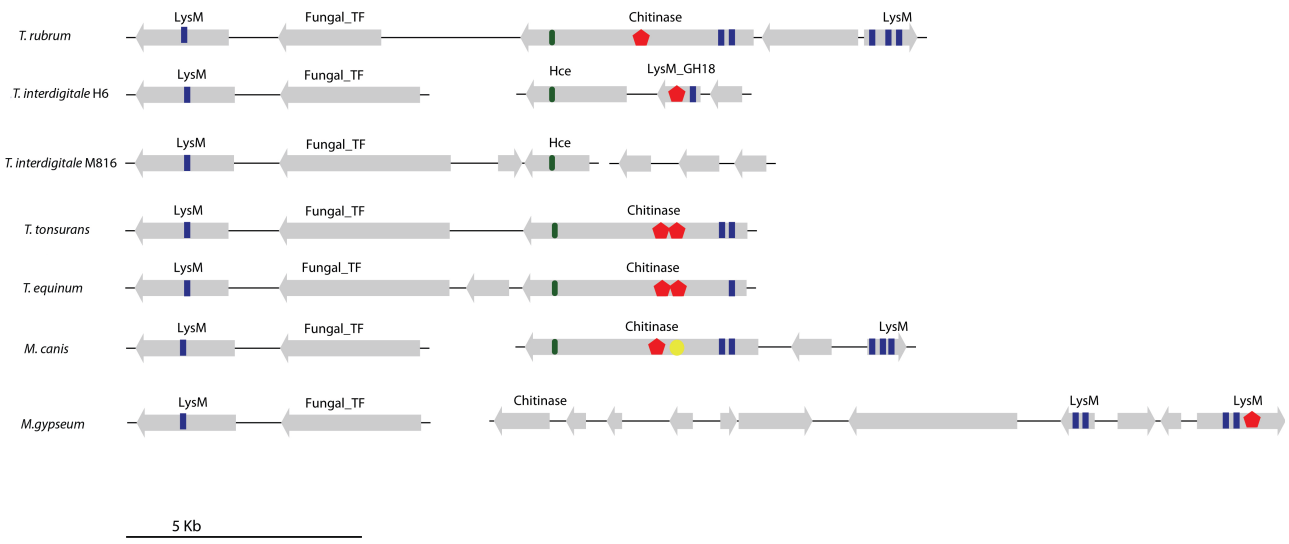

**Figure S7. Variation in LysM-Hce gene cluster across sequenced Dermatophytes.** In *T. rubrum*, the LysM-Hce gene is closely linked to two other LysM genes; this organization is most similar to that found in *M. canis*, although these genes are located on two different scaffolds.
